# Supplementary material for: Discovery and Computer Aided Potency Optimization of a Novel Class of Small Molecule CXCR4 Antagonists
Source: PubMed Central journal article supplement (PMC3800133; doi:10.1371/journal.pone.0078744), 2013-10-18

**Flow cytometry results for expression of CXCR4 in MDA-MB-231, MDA-MB-453, and U87 cells**

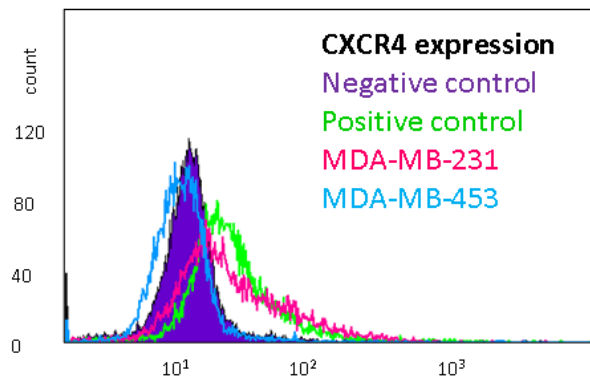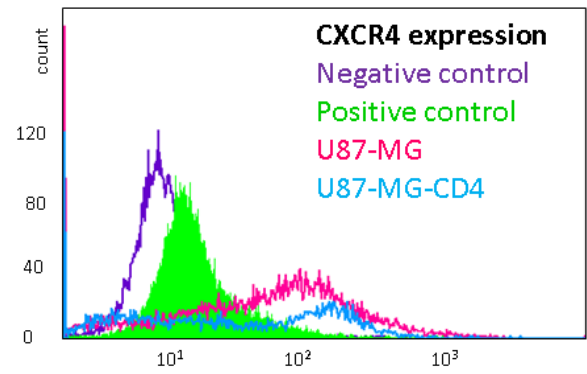

Supplement: pone.0078744.s002.pdf [file pone.0078744.s002.pdf]
